# Supplementary material
Source: publisher site journal article supplement (https://www.dovepress.com/article/401452)
Supplement: Supplementary file 1 [file get_supplementary_file.php]

**Supporting Information**

**Data collection**

In the following, the data collection process is described in detail. After the acquisition and the initial online screening for possible insomnia symptoms, we contacted the participants. During this telephone call, the study procedure was explained, and open questions were clarified. An appointment was made for the session at the university's premises. To minimize serial effects, participants were randomly allocated to either firstly complete a two-week phase of sleep diary, actigraphy and ambulatory assessment or an online questionnaire battery at home. It took approximately 30 to 70 minutes to complete the online questionnaire depending on reading speed. The participants were instructed to use a quiet alone time in order to answer the questions undisturbed and without time pressure. The questionnaire battery included an age-appropriate version of the Ford Insomnia Response to Stress Test (FIRST) to measure sleep reactivity.4 The paper-pencil sleep diary was answered every morning and evening during 14 consecutive days. In the second week, they also wore the actigraph. The participants were instructed to press the event marker, when going to bed in the evening and when standing up in the morning. As a next step, the appointment took place at the university’s laboratory rooms. During this approximately two-hour meeting, first the sleep interview was conducted, followed by puppilography, and a questionnaire battery with three questionnaires including the Youth Self Report (YSR) and the Questionnaire on Resources in Childhood and Adolescence (FRKJ 8-16).21,22 In order to be able to catch any emotional distress that might occur due to the more sensitive items of the YSR, the questionnaires were answered on-site instead of online. To minimize a response tendency towards social desirability we instructed the participants as follows: "Some of the questions are very personal. However, no one will look at your specific answers to single questions, but only at the average of all questions from all participants who are taking part in the study. So, none of us will glance at what you have answered to a certain question. If you have questions, just call me. In the meantime, I will be waiting in the room in front of you (pointing to the room) so that you can answer the questions in private. When you are done with the questionnaires, you are welcome to sit here for a few minutes, if you want to. Come over and knock when you are ready to continue." The investigator left the room while the questionnaires were being answered but was within shouting distance two rooms away for follow-up questions or problems. After completing the questionnaires, the participants called the experimenter back into the room and underwent one memory task and two attention tasks which are not relevant to the research questions that are the focus of this paper.

After an average duration of 9 months and 17 months, we contacted the adolescents again for the second measurement wave (T2) and the third measurement wave (T3), respectively. At all measurement waves, data were based on self-reports of the adolescents.

**Instruments**

***Sleep Reactivity***

The German version of the Ford Insomnia Response to Stress Test (FIRST) assessed sleep reactivity, e.g., the likelihood of having sleep disruption in association with specific and common stressful events or periods of stress occurring during this or the next day.14 The FIRST was used in an adapted version for children and adolescents. Item examples are “When you know that something very important is going to happen the next day (for example, that you are going to write a test), do you have trouble sleeping?” (item 1), “If you've had a bad day at school, do you have trouble sleeping?” (item 6), and “If you know that you have to present something orally to the whole class the next day (e.g. your homework or a presentation), do you have trouble sleeping?” (item 8). The response scale for the nine items ranges from (1) *never* to (4) *always.* The total score ranges between 9 and 36. Higher values represent a greater vulnerability for stress-related insomnia. The cut-offs of FIRST ≥ 16 and FIRST ≥ 18 reflect moderate and high risk for future insomnia.6 In this study we used the cut-off of FIRST ≥ 18 for a high risk, which is also close to the median in this sample (*Mdn* = 19). The internal consistency is α = .80 in the study by Dieck et al.14 and αT1 = .84 in the present study. To evaluate the one-factor structure of the FIRST questionnaire in our youth sample, we performed a Confirmatory Factor Analysis with Robust Maximum Likelihood. The reported results are based on the first measurement time with N = 185 adolescents. The following requirements were fulfilled: (1) The correlation coefficients (r) were above 0.3 and none of the items presented correlations higher than .80, indicating no multicollinearity or singularity problems; (2) no multinormal outliers were present indicated by non-significant values of Mahalanobis distances; and (3) with N = 185 the sample size was sufficient. The one-factor solution demonstrated good fit for RMSEA (0.042, 95% CI[0.00, 0.079]), CFI (0.984) and TLI (0.978), when residual covariance was allowed between Item 2 (“After a stressful experience during the day”) and Item 3 (“After a stressful experience in the evening”) as recommended by modification indices. The chi-square test indicated no significant difference between the model and the data (χ2[26] = 33.53, p = .15). Regarding the latent factor, the explained variance ranged between 23% (Item 9, “Before going on vacation the next day”) and 65% (Item 4, “After getting bad news during the day”).

***Insomnia***

A semi-structured sleep interview was used to assess different sleep disorders including insomnia. In accordance with the International Classification of Sleep Disorders (3rd ed. ICSD-3), insomnia was diagnosed if an adolescent reported difficulties falling asleep or staying asleep (despite having an adequate opportunity to sleep), resulting in significant daytime consequences (e.g., sleepiness, difficulties with concentration and memory, mood lability, social or school difficulties) at least three times a week.16 Acute insomnia was diagnosed if all criteria were fulfilled for at least one month and chronic insomnia if the criteria were fulfilled for three month or longer. To fall into the category of those with insomnia at least acute insomnia had to be present, which was the case for 13 participants (21% of the participants with insomnia; 7% of all participants). Forty-nine participants suffered from chronic insomnia for at least three consecutive months (79% of the participants with insomnia; 26% of all participants). Regarding stability, 11% of the participants were diagnosed with insomnia at all three measurement points, indicating persistent insomnia. On the other hand, 48% of the participants were not diagnosed with insomnia at any measurement time point. Twenty percent were diagnosed at only one measurement wave, and 9% at T1 and T2, as well as 7% at T2 and T3. Both, girls and boys suffering from insomnia at baseline had a high probability of still having an insomnia diagnosis 9 months later (ORgirls = 4.61, 95% CI[1.78, 11.98]; ORboys= 10.01, 95% CI[2.21, 45.34]) and 17 months later (ORgirls = 2.32, 95% CI[0.88, 6.09]; ORboys = 8.82, 95% CI[1.85, 42.07]).

***Sleep Duration, Sleep Onset Latency, Midpoint of Time in Bed, Sleep Quality***

Continuous sleep under natural conditions was assessed by actigraphy using the MotionWatch 8 (CamTech; United Kingdom), which detects sleep-wake patterns by recording ambulatory activity. The device was worn on the non-dominant wrist for seven consecutive days. The event marker and corresponding sleep diaries were used to verify and adapt actigraphy data, particularly bedtimes and sleep latency. At least 4 of the 7 nights of measurements had to be available for the following parameters to be extracted: *Total Sleep Time (TST),* *Sleep Onset Latency (SOL), and Midpoint of Time in Bed (TIB).* Midpoint of Time in Bed was calculated as starting bedtime + (TIB/2) and can be understood as an indicator for the bedtime/sleep scheduling behavior: Earlier midpoints of TIB indicate earlier bedtimes in the evening along with earlier rising times in the mornings, while later midpoints of TIB indicate later bedtimes in the evening along with later rising times in the mornings. For example, a participant goes to bed at 23:00 pm and stays in bed for 8 hours than the midpoint of TIB would be 3:00 am. Another participant would go to bed at 1:00 am for 7 hours, so the midpoint would be at 4:30 am. All actigraphy parameters were extracted as averages across the available days. The subjective average *Sleep Quality* (“How do you rate sleep quality overall?”) was extracted from the sleep diary evaluated daily from (1) *very good* to (6) *very bad*.

***Mobile Phone Usage Before Sleep***

The average duration of *Pre-sleep Mobile Phone Use in Bed* was captured via the two-week sleep diary. Participants answered the following item on an open response format: “Did you use your smartphone in bed at night? If yes, how long? (In minutes)”. The average time of use across the two-week interval was calculated.

***Pre-Sleep Arousal***

The German version of the Pre-Sleep Arousal Scale (α= .87) captures somatic and cognitive pre-sleep arousal. The 15 items (e.g., “A tight, tense feeling in your muscles”, “Thoughts keep racing through your head”) were rated on a 5-point-Likert scale ranging from (1) *not at all* to (5) *extremely.*17 The internal consistencies for cognitive and somatic arousal are αcognitive = 80 and αsomatic = .90 according to Gieselman et al.17, and α = .89 for the total sum score used in this study.

***Negative Sleep-Related Cognitions***

The questionnaire on sleep-related cognitions measures positive and negative sleep-related cognitions.18 In this analysis we focused on the subscale *Negative Sleep-related Cognitions*, which was assessed by *Catastrophizing Thinking* (e.g., “I will go crazy if I cannot fall asleep”), *Sleep Drug Use* (e.g., “Against my sleep disturbances only a medicine helps”), and *Sleep Anxiety* (e.g., “It's clear that I can't perform after so little sleep”). A sum score of 18 items, each answered on a scale ranging from (1) *nearly never* to (4) *nearly always,* was calculated*.* Cronbach’s alphas for the subscales ranges from .74 to .85 in the original sample.18 The internal consistency for sum score of negative sleep-related cognition is α = .91 in this sample.

***Stress Experience***

Experienced stress intensity regarding potentially stressful experiences or situations is assessed by the short version of the Adolescent Stress Questionnaire-S (ASQ-S), which distinguishes nine domains (*Stress of Home Life*, *Stress of School Performance*, *Stress of School Attendance*, *Stress of Romantic Relationships*, *Stress of Peer Pressure*, *Stress of Teacher Interaction*, *Stress of Future Uncertainty*, *Stress of Financial Pressure*, and *Stress of School/Leisure Conflict*).19 Twenty-seven items are rated on 5-point Likert scales ranging from (1) *not stressful at all*/*did not occur* to (5) *very stressful*. The internal consistencies in the original sample and in the present sample were .93 and .92, respectively.19

***Stress vulnerability***

The subscale *Stress vulnerability* of the Stress and Coping Questionnaire for Children and Adolescents (SSKJ 3-8-R) captures the transsituational extent of stress vulnerability in everyday life situations in adolescence.20 The anticipated stress in seven daily life situations (e.g., “Imagine you have a lot of homework, and you can't cope with it. How much stress do you have when something like this happens to you?”) had to be answered on a scale ranging from (1) *no stress at all* to (4) *very much stress* and can be summed up to a sum score of 7 to 28 points. Higher values indicate higher stress vulnerability. The internal consistencies in the original sample by Lohaus et al.20 and in the present study were .70 and .75, respectively.

***Psychological Symptoms***

The German version of the Youth Self Report 11-18R (YSR 11-18R) is a self-report questionnaire related to adolescents’ mental health using 112 items, answered on a 3-point Likert scale ranging from (0) *not true*, over (1) *somewhat or sometimes true*, to (2) *very true or often true*.21 Two sum scores can be calculated representing internalizing symptoms (30 items) and externalizing symptoms (32 items). As we investigate the relationships between internalizing/externalizing symptoms and insomnia, item 47 concerning nightmares was left out in the calculation of the internalizing score, thereby eliminating a possible increase of the correlation due to construct resemblance. Cronbach’s alpha was .89/.87 in the present study and .88/.85 in the norm sample for internalizing and externalizing symptoms.21 Cronbach’s alpha was the same for the internalizing sub score with and without the sleep-related item.

***Resources***

The Questionnaire on Resources in Childhood and Adolescence (FRKJ 8-16) provides an assessment of *Personal Resources* (i.e., *Empathy and Perspective Taking, Self-efficacy, Self-esteem, Sense of Coherence, Optimism, Self-control*) and *Social Resources* (i.e., *Parental Emotional and Social Support, Authoritative Parenting Style, Peer Group Integration, School Integration*).22The 60 items are answered on a 4-point Likert scale ranging from (1) *never true* to (4) *always true*. The sum scores vary between 36 to 144 and 24 to 96 with higher scores indicating more subjectively perceived personal /social resources, respectively. Cronbach’s alpha was .87/.91 in the present study for personal and social resources, while Cronbach’s alpha ranged between .68 and .89 for the second level subscales in the original sample.22

***Other variables***

The demographic questionnaires from the first wave of measurements provided us with information on age and sex. Moreover, pubertal status was evaluated by the German version of the Puberty Development Scale.23 Based on three items a “Puberty Category Score” (PCS) was calculated, which indicated (1) *prepubertal*, (2) *beginning pubertal*, (3) *midpubertal*, (4) *advanced pubertal* to (5) *postpubertal* stage. For females, menarche, breast development, and body hair growth were integrated in the PCS score, and pubertal status are defined as follows: Stage I: PCS = 2 without menarche; Stage II: PCS = 3 without menarche; Stage III: PCS > 3 without menarche; Stage IV: PCS ≤ 7 with menarche; Stage V: PCS ≥ 8 with menarche. For males, facial hair growth, deepening of the voice, and pubic hair growth were integrated in the PCS score, and pubertal status are defined as follows: Stage I: PCS = 3; Stage II: PCS = 4 - 5; Stage III: PCS = 6 – 8; Stage IV: PCS = 9 – 11; Stage V: PCS = 12.

As the SARs-CoV-2 pandemic with related social and structural disruptions widely led to emerging mental health issues including sleep difficulties, the subjective overall burden experienced through the pandemic and related issues was included as a covariate in the analyses. The item “The current corona situation can trigger uncertainty or fear in people. How strongly do you feel burdened by the current situation?” was answered on a scale from (0) *not at all* to (5) *very much*. The item was implemented after the onset of the beginning of the pandemic, i.e., at some T1 data collections and at all T2 and T3 collections. Participations before the onset of the pandemic in Germany (e.g., mid-March 2020) during the baseline data collection have been assigned a 0, indicating no overall experienced burden related to the pandemic. This procedure was appropriate as no participant responded with a zero to the question. The average COVID-19 burden was 0.68 (*SD* = 1.18) for the total sample at baseline and 2.38 (*SD* = 0.88) when only those participants whose data collection occurred after the onset of the pandemic were considered. The total sample`s average at T2 with 2.51 (*SD* = 0.95) was comparable. In the profile analysis and the cross-sectional prediction of insomnia the COVID-19-related burden at T1 was included as covariate. Regarding the prediction of future insomnia at T2/T3, the COVID-19-related burden at T2 was included as covariate.
